1 **Tracking animal reservoirs of pathogenic *Leptospira*: the right test**  
2 **for the right claim.**

3

4 Yann Gomard<sup>1</sup>, Koussay Dellagi<sup>2</sup>, Steve Michael Goodman<sup>3,4</sup>, Patrick Mavingui<sup>1</sup> and Pablo  
5 Tortosa<sup>1</sup>.

6

7 <sup>1</sup> Unité Mixte de Recherche Processus Infectieux en Milieu Insulaire Tropical (UMR PIMIT)  
8 Université de La Réunion, CNRS 9192, INSERM U1187, IRD 249, Plateforme  
9 Technologique CYROI, 2 rue Maxime Sainte-Clotilde, La Réunion, France.

10 <sup>2</sup> Department of international affairs, Institut Pasteur, Paris, France.

11 <sup>3</sup> Field Museum of Natural History, 1400 South Lake Shore Drive, Chicago, Illinois 60605,  
12 USA

13

14 <sup>4</sup> Association Vahatra, BP 3972, Antananarivo 101, Madagascar

15

16

17 **Abstract.**

18 Leptospirosis, caused by a pathogenic *Leptospira* bacteria, is the most prevalent zoonosis  
19 worldwide and in this context has been extensively investigated through a One Health  
20 framework. Diagnosis of human leptospirosis includes molecular and serological tools, with  
21 serological Microscopic Agglutination Test (MAT) still being considered as a gold standard.  
22 Mammals considered as biological reservoirs include species or populations that are able to  
23 maintain chronic infection and shed the bacteria via their urine in the environment. *Leptospira*  
24 bacteria are often investigated using the same diagnosis tool, serological MAT. However,  
25 MAT testing of putative animal reservoirs can lead to mis-interpretations as it can signal  
26 previous infection and not necessarily bring in robust information regarding the capacity of  
27 such sero-positive animals to maintain chronic infection. We use previously published data  
28 and present new results on introduced and endemic small mammals to show that MAT should  
29 not be used for the identification of reservoirs. By contrast, serological data are informative  
30 on the level of exposure of animals occupying a specific environment. Finally, we present a  
31 sequential methodology to investigate human leptospirosis in a One Health framework that  
32 associates molecular detection in humans and animals, together with MAT of human samples  
33 using *Leptospira* isolates obtained from reservoir animals occurring in the same environment.

34

## 35 **Introduction**

36 Leptospirosis is claimed as the most widespread bacterial zoonosis worldwide causing over  
37 one million human cases and nearly 60,000 deaths per year (Costa *et al.* 2015a). Despite its  
38 medical and veterinary importance, the burden of the disease remains underestimated in  
39 numerous countries, stimulating epidemiological investigations conducted in a One Health  
40 framework and aiming to identify the major drivers of the disease (Vinetz *et al.* 2005; Smythe  
41 and Chappel 2012; Allan *et al.* 2015). Leptospirosis is caused by pathogenic bacteria  
42 belonging to the genus *Leptospira* (family Leptospiraceae), which have been historically  
43 classified using antigenic determinants through Microscopic Agglutination Test (MAT)  
44 (Martin and Pettit 1918) and Co-Agglutination Absorption Technique (CAAT), allowing to  
45 define over 20 serogroups and 300 serovars (Levett 2001; Picardeau 2013). Molecular tools  
46 have been more recently developed and have revealed a high genetic diversity of *Leptospira*  
47 (Picardeau 2013; Saito *et al.* 2013; Bourhy *et al.* 2014) with several additional species later  
48 uncovered by genomic approaches (Guglielmini *et al.* 2019; Vincent *et al.* 2019).

49 The main biological cycle of pathogenic *Leptospira* involves wild or domestic animals acting  
50 as reservoirs through the shedding of the bacteria via their urine in the environment (Ko,  
51 Goarant and Picardeau 2009). Humans get mostly (but not only, see Bulach *et al.* 2006)  
52 infected through indirect contact with a contaminated environment. Although virtually all  
53 mammal species can get infected by these pathogenic bacteria, some requirements are needed  
54 to consider them as reservoirs (Babudieri 1958), and indeed only a limited number of species  
55 have been definitively shown to support chronic maintenance of the bacteria in their kidneys.  
56 Rodents are considered as the main reservoirs but other mammals such as bats (Dietrich *et al.*  
57 2015), invasive (Cosson *et al.* 2014; Costa *et al.* 2015b) or endemic (Dietrich *et al.* 2014;  
58 Lagadec *et al.* 2016) small terrestrial mammals as well as cattle (Barragan *et al.* 2016;  
59 Guernier *et al.* 2016) have been identified as important reservoirs of *Leptospira*. The  
60 multiplication of pathogenic bacteria in animal reservoirs has been examined in experimental  
61 infections of mice under laboratory controlled conditions (Ratet *et al.* 2014). Using  
62 bioluminescent *Leptospira*, authors showed that a systemic infection associated with weight  
63 loss can occur within three days following intra peritoneal infection. Thereafter, within a  
64 week, bacteria become rapidly invisible while animals return to a body weight that is hardly  
65 distinguishable from that of control animals. Then, a bioluminescent signal of *Leptospira*  
66 appears in two spots, corresponding to kidneys where bacteria actively divide leading to a  
67 glowing signal persisting for months while systemic infection has apparently irreversibly  
68 vanished (Ratet *et al.* 2014).

69 Hence, the fate of pathogenic *Leptospira* appears to be different in reservoir and incident  
70 hosts, with a systemic infection followed by renal colonization in the former contrasting with  
71 a general absence of renal colonization in the latter. The separation between reservoir and  
72 incident hosts may be not that clear cut and depends on different parameters. Indeed,  
73 experimental infections have shown that survival of infected animals and shedding of bacteria  
74 depend on the bacterial strains, the infecting bacterial dose, the vertebrate species concerned,  
75 as well as the routes of infection (Ratet *et al.* 2014; Matsui *et al.* 2015; Wunder *et al.* 2016;  
76 Gomes-Solecki, Santecchia and Werts 2017). For instance, experimental infection of Golden  
77 hamsters considered as models of acute infection may lead to chronic shedding in the few  
78 animals surviving the infection (Cordonin *et al.* 2019). However, the colonization of renal  
79 tubules, which is typical of animal reservoirs, has a considerable immunological consequence:  
80 pathogenic *Leptospira* organized in biofilms in the lumen of renal tubules (Ristow *et al.* 2008)  
81 remain hidden from the immune system. Since the duration of sero-positivity following  
82 infection is not well known (Lloyd-Smith *et al.* 2007), the immunological signature detected  
83 in sera may not reflect the *Leptospira* that are chronically shed by the reservoir animal.

84 Beside its use in *Leptospira* classification, MAT is considered as the reference test for  
85 leptospirosis diagnosis in incident hosts (humans and domestic animals), as it allows detecting  
86 host antibodies testifying to current, recent, and past infections (Levett 2001; Musso and La  
87 Scola 2013). MAT has also been widely used for the investigation of animal reservoirs  
88 (Roberts *et al.* 2010; Desvars *et al.* 2012; Assenga *et al.* 2015; Andersen-Ranberg, Pippert and  
89 Jensen 2016; Rodrigues *et al.* 2016; Sigaud *et al.* 2009) but some studies indicate that MAT  
90 does not definitively verify the carrier status of a given animal species (Ellis, O'Brien and  
91 Cassells 1981; Miraglia *et al.* 2008; Libonati, Pinto and Lilenbaum 2017; Sant'anna *et al.*  
92 2017). In the present work, we present further support for these latter observations and argue  
93 that the use of MAT may lead to misconclusions regarding the importance of investigated  
94 animal species as reservoirs.

95 To support our purposes, we focused on animal species known as pathogenic *Leptospira*  
96 reservoirs on Southwestern Indian Ocean (SWIO) islands. This region is home to a wide  
97 diversity of mammals, many being endemic, as well as introduced rodents (family Muridae)  
98 and shrews (family Soricidae). The typing of *Leptospira* excreted by mammals in this region  
99 has demonstrated high levels of *Leptospira*-host specificity (Dietrich *et al.* 2014, 2018;  
100 Gomard *et al.* 2016; Lagadec *et al.* 2016). Indeed, the region is home to a large diversity of  
101 bats from seven different families that represent multiple colonizations of the region and  
102 endemic terrestrial mammals of the family Tenrecidae and subfamily Nesomyinae (each

103 representing separate adaptive radiations), which appear to be the exclusive reservoirs of  
104 specific pathogenic *Leptospira*, providing interesting biological circumstances to address the  
105 power of MAT for investigating leptospirosis epidemiology.

106 Three animal species from the SWIO region, known to host distinct bacterial lineages/species,  
107 were included in the present investigation. Using published molecular and serological data  
108 together with original results, we demonstrate that *Leptospira* serological signatures are not  
109 necessarily connected to the *Leptospira* excreted by animal reservoirs. We demonstrate the  
110 shortfalls of MAT used alone for the identification of *Leptospira* animal reservoirs and  
111 discuss the utility of MAT for clarifying leptospirosis epidemiology.

112

## 113 **Materials and methods**

### 114 *Ethical considerations.*

115 Biological materials screened in the present study were sampled in the context of a research  
116 program for which permits numbers and IACUC acceptance have been presented elsewhere  
117 (Dietrich *et al.* 2018).

118

### 119 *Animal sampling, Leptospira serological, and molecular data.*

120 Three mammal species from the SWIO were included in the study: *Mormopterus*  
121 *acetabulosus* (Molossidae), an insectivorous bat species endemic to Mauritius Island; *Tenrec*  
122 *ecaudatus* (Tenrecidae), an omnivorous terrestrial mammal species endemic to Madagascar  
123 and introduced to several SWIO islands, including Reunion Island and Mayotte; an invasive  
124 rodent species, *R. rattus* (Muridae) sampled both on Reunion Island and on Mayotte (Table  
125 1). Most of these species were previously investigated for *Leptospira* infection through  
126 molecular and/or serological methods by different researcher groups (Desvars *et al.* 2012,  
127 2013; Pagès *et al.* 2015; Guernier *et al.* 2016; Lagadec *et al.* 2016; Dietrich *et al.* 2018). In  
128 addition, we produced serological data through MAT for the *M. acetabulosus* samples. The  
129 same individual specimens were previously investigated for *Leptospira* infection through  
130 molecular methods (Dietrich *et al.* 2018). MAT was performed essentially as previously  
131 described (Biscornet *et al.* 2017) using 18 *Leptospira* strains and screening most serogroups  
132 reported in both human cases and animals on SWIO islands (Table S1). A serum was  
133 considered as positive when the MAT titer was  $\geq 1:100$ .

134

## 135 **Results**

136 *Bats*

137 Serotyping of *Mormopterus acetabulosus* samples through MAT indicates that 20.0% (6/30)  
138 of specimens were seropositive, with sera agglutinating Panama and Pyrogenes serogroups  
139 (Table 2 and S2). Using nucleic acids extracted from the kidneys of the same individual  
140 specimens, Dietrich et al. (2018) reported that 73.3% (22/30) of the animals tested positive  
141 through Real-Time Polymerase Chain Reaction (RT-PCR), showing poor agreement between  
142 MAT and RT-PCR (Kappa test = 0.17). More specifically, the six MAT-positive bats were  
143 also positive by RT-PCR while, most importantly, 66.6% of the remaining MAT-negative  
144 bats (16/24) tested positive by RT-PCR. The sequencing of RT-PCR-positives specimens  
145 (also positive in MAT) confirmed that *M. acetabulosus* harbors a *Leptospira* bacterial  
146 sequence falling within the *Mormopterus*-borne *Leptospira* monophyletic clade embedded in  
147 *L. borgpetersenii* (Dietrich et al. 2018) (Table 2).

148

149 *Rats*

150 Introduced populations of *Rattus rattus* are present on both Mayotte and Reunion Island, but  
151 molecular and serological screenings highlight striking differences between these two islands  
152 (Table 2). On Mayotte, three serogroups have been previously reported, namely Mini,  
153 Pyrogenes, and Grippytyphosa, whereas on Reunion Island the main detected serogroups  
154 correspond to Icterohaemorrhagiae, Canicola, Sejroe, Mini, and Cynopteri (Desvars et al.  
155 2012, 2013). The molecular investigations of *R. rattus* on both islands confirms sharp inter  
156 island differences, with Reunion Island animals harboring strictly *L. interrogans* (Guernier et  
157 al. 2016), while on Mayotte this rodent may harbor either of three distinct *Leptospira* species  
158 (*L. interrogans*, *L. borgpetersenii*, and *L. kirschneri*) (Lagadec et al. 2016).

159 On Reunion Island, a study investigated an outbreak of human leptospirosis after a triathlon  
160 and included 10 *R. rattus* that were incidentally trapped at the site where the sporting event  
161 took place a few weeks before the event. Five out of the 10 sampled rats tested positive by  
162 PCR based on kidney samples. The sequencing of the positive samples revealed only *L.*  
163 *interrogans* (Pagès et al. 2015; Guernier et al. 2016). Of note, two of the PCR-positive  
164 specimens were positive through MAT, whereas the remaining PCR-positive rats were sero-  
165 negative.

166

167 *Tenrecs*

168 On Reunion Island, three serogroups have been reported in *Tenrec ecaudatus*:  
169 Icterohaemorrhagiae usually detected with high titers, while Canicola and Bataviae

170 serogroups are agglutinated with low titers (Desvars *et al.* 2013a; Sigaud *et al.* 2009) (Table  
171 2). Although these serogroups have been detected with moderate to high prevalence on  
172 Reunion Island, *T. ecaudatus* is not considered as a *Leptospira* reservoir on that island since  
173 renal carriage could not be demonstrated through two independent studies (Desvars *et al.*  
174 2013; Guernier *et al.* 2016) (Table 2). This absence of infection on Reunion Island contrasts  
175 with the situation on Mayotte, where *T. ecaudatus* was identified as the exclusive reservoir of  
176 *L. mayottensis*, a pathogenic species commonly associated with human leptospirosis on that  
177 island (Lagadec *et al.* 2016) (Table 2).

178

## 179 **Discussion**

180 Microscopic Agglutination Test (MAT) has been, and still is, considered the gold standard for  
181 leptospirosis diagnosis in humans. A meta-analysis has calculated the mean prevalence in  
182 reservoir mammals using the data published in 300 papers including eight different  
183 taxonomic orders (Andersen-Ranberg, Pipper and Jensen 2016). MAT and PCR were given  
184 an equivalent weight in that analysis, and the nature of the screened samples, *i.e.* blood (for  
185 MAT and PCR) or kidney/urine (for PCR only) was not taken into consideration. Hence,  
186 acute/passed infections and chronic kidney carriage were not distinguished in that study, as  
187 has been done in several others. In the bat samples screened in the present study, we  
188 demonstrate a poor agreement between data from serological and molecular analyses. Similar  
189 findings were also reported on a fruit bat species, *Pteropus alecto* (Pteropodidae), from  
190 Australia (Cox, Smythe and Leung 2005), which indicated poor agreement between PCR  
191 (detection on kidneys) and serological data; these results underlined that a carrier status for  
192 this species could not be shown based on serology. In Brazil, studies have reported limited or  
193 absence of agreement between PCR (detection in urine) and serological results in livestock  
194 animals or asymptomatic dogs (Hamond *et al.* 2014; Sant'anna *et al.* 2017).

195 The bat species investigated herein belongs to the genus *Mormopterus*, which includes within  
196 the SWIO region two other species, *M. francoismoutoui* and *M. jugularis*, endemic to  
197 Reunion Island and Madagascar, respectively. Recently, the research on these three molossid  
198 bats has shown that they shelter pathogenic *Leptospira* clustering into a single monophyletic  
199 *L. borgpetersenii* clade (Gomard *et al.* 2016; Dietrich *et al.* 2018). Interestingly, the screening  
200 of *M. acetabulosus* specimens through MAT reveals that sera agglutinate two distinct  
201 serogroups, *i.e.* Panama, and Pyrogenes. Although there is poor congruence between

202 serogroups and genomospecies, members of Panama serogroup can be found in two species,  
203 *L. noguchii* and *L. inadai* (Levett 2001), but not in *L. borgpetersenii*. This suggests that the  
204 Panama serogroup signature results from independent systemic infections, which have cleared  
205 out without leading to renal colonization.

206 Although the molecular and serological analyses from *Rattus* and *Tenrec* were not all  
207 obtained from the same specimens, the results presented herein hardly support any agreement  
208 of data obtained from molecular and serological work. Interestingly, the investigation of these  
209 two mammal genera on Mayotte and Reunion Island highlight the importance of  
210 independently evaluating the reservoir status of a given mammal species on different islands,  
211 as *Rattus* do not shelter the same *Leptospira* species. The investigation of *Tenrec* is more  
212 compelling. While on Mayotte *T. ecaudatus* is the exclusive carrier of the recently described  
213 *L. mayottensis*, investigations on Reunion Island showed that up to 81% of individual *Tenrec*  
214 were seropositive (mostly reacting against Icterohaemorrhagiae) but not one individual showed  
215 evidence for chronic kidney infection (Desvars *et al.* 2013; Guernier *et al.* 2016). On Reunion  
216 Island, *T. ecaudatus* is therefore not a reservoir of *Leptospira* and Icterohaemorrhagiae  
217 serogroup revealed through MAT should be considered as evidence of animal exposure to the  
218 *Leptospira* actually present in the environment.

219 In our tested samples, some individuals were positive through PCR but negative through  
220 MAT. These discrepancies may result from past infections and subsequent kidney  
221 colonization followed by titer decay and eventually seronegativation, as previously reported  
222 in animal reservoirs (Lloyd-Smith *et al.* 2007) and incidental hosts (Blackmore, Schollum and  
223 Moriarty 1984; Lupidi *et al.* 1991; Cumberland *et al.* 2001). We propose that conflicting  
224 results of known reservoirs, such as bats testing positive through MAT but negative through  
225 PCR using kidney tissues and/or urine, are best explained by animals that experienced past  
226 infections in which *Leptospira* did not colonize the kidneys. This absence of colonization  
227 might be related to a low infecting dose and/or from an infecting bacterial genomospecies that  
228 is unable to establish persistent renal colonization in a specific vertebrate species. This  
229 assumption is based on the existence of host-*Leptospira* molecular determinants required for  
230 renal colonization, an hypothesis substantiated by experimental infections in which bat-borne  
231 and Tenrec-borne *Leptospira* were not able to lead to chronic infection in rats (Cordonin *et al.*  
232 2020).

233 Finally, the biological setting of SWIO islands brings further evidence of problems using  
234 MAT for the identification of *Leptospira* reservoirs. Several studies have used MAT on  
235 samples of wild animals to address their role in the epidemiology of leptospirosis. As  
236 demonstrated here, this serological technique is very useful as it opens a window on  
237 environmental exposure to *Leptospira*. However, even though it is clearly important to  
238 address the diversity and intensity of *Leptospira* exposure in an environmental setting, we  
239 emphasize that MAT data from investigated animals cannot lead to any robust conclusion  
240 regarding their role as a reservoir. Such investigations, carried out in a One Health framework  
241 require bacterial genotyping using kidney or urine samples so that bacteria excreted by  
242 mammal reservoirs can be compared to those identified in acute human cases. Ultimately, a  
243 thorough investigation of leptospirosis following a One Health framework would require (i)  
244 PCR screening of urine or kidney tissues from putative animal reservoirs, (ii) isolation of  
245 *Leptospira* from identified reservoirs, and (iii) the inclusion of these isolates in a MAT panel  
246 used to screen human sera collected from persons living or having a professional/recreational  
247 activity in the investigated environment. Such investigations would allow not only identifying  
248 animal reservoirs in a specific environmental setting, but highlighting those bacterial  
249 species/lineages of major medical concern.

## 250 **Acknowledgements**

251 The sampling of *Mormopterus acetabulosus* on Mauritius Island was supported by a grant  
252 from European Research Development Fund (ERDF) “Pathogènes associés à la Faune  
253 Sauvage Océan Indien” #31189. Sampling and export permits were granted by the National  
254 Parks and Conservation Service (NPCS) of the Ministry of Agro-industry & Food Security of  
255 Mauritius. Original serological data presented in the manuscript were granted by ERDF  
256 InterregV ECOSPIR “Eco-épidémiologie des leptospires endémiques de l’Océan Indien : des  
257 bactéries à risque pour les populations humaines ?” #RE6875. We are thankful to the director  
258 M. Puttoo and R. Sookhareea for their assistance in the field. This work is dedicated to the  
259 memory of Dr. A. Michault from the Centre Hospitalier Universitaire (CHU) Saint Pierre,  
260 who brought considerable help in the serological analysis.

261

262



## 263 **References**

- 264 Allan KJ, Biggs HM, Halliday JEB *et al.* Epidemiology of Leptospirosis in Africa: A  
265 Systematic Review of a Neglected Zoonosis and a Paradigm for ‘One Health’ in Africa.  
266 *PLoS Negl Trop Dis* 2015;**9**:e0003899.
- 267 Andersen-Ranberg EU, Pipper C, Jensen PM. Global patterns of *Leptospira* prevalence in  
268 vertebrate reservoir hosts. *J Wildl Dis* 2016;**52**:468–77.
- 269 Assenga JA, Matemba LE, Muller SK *et al.* Predominant leptospiral serogroups circulating  
270 among humans, livestock and wildlife in Katavi-Rukwa ecosystem, Tanzania. *PLoS Negl*  
271 *Trop Dis* 2015;**9**:e0003607.
- 272 Babudieri B. Animal reservoirs of leptospires. *Ann N Y Acad Sci* 1958;**70**:393–413.
- 273 Barragan V, Chiriboga J, Miller E *et al.* High *Leptospira* Diversity in Animals and Humans  
274 Complicates the Search for Common Reservoirs of Human Disease in Rural Ecuador.  
275 *PLOS Negl Trop Dis* 2016;**10**:e0004990.
- 276 Biscornet L, Dellagi K, Pagès F *et al.* Human leptospirosis in Seychelles: A prospective study  
277 confirms the heavy burden of the disease but suggests that rats are not the main reservoir.  
278 *PLoS Negl Trop Dis* 2017;**11**:e0005831.
- 279 Blackmore DK, Schollum LM, Moriarty KM. The magnitude and duration of titres of  
280 leptospiral agglutinins in human sera. *N Z Med J* 1984;**97**:83–6.
- 281 Bourhy P, Collet L, Brisse S *et al.* *Leptospira mayottensis* sp. nov., a pathogenic *Leptospira*  
282 species isolated from humans. *Int J Syst Evol Microbiol* 2014:ijs.0.066597-0.
- 283 Bulach DM, Zuerner RL, Wilson P *et al.* Genome reduction in *Leptospira borgpetersenii*  
284 reflects limited transmission potential. *Proc Natl Acad Sci U S A* 2006;**103**:14560–5.
- 285 Cordonin C, Turpin M, Bascands J-L *et al.* Three *Leptospira* Strains From Western Indian  
286 Ocean Wildlife Show Highly Distinct Virulence Phenotypes Through Hamster  
287 Experimental Infection. *Front Microbiol* 2019;**10**, DOI: 10.3389/fmicb.2019.00382.
- 288 Cordonin C, Turpin M, Bringart M *et al.* Pathogenic *Leptospira* and their animal reservoirs:  
289 testing host specificity through experimental infection. *Sci Rep* 2020;**10**:7239.
- 290 Cosson J-F, Picardeau M, Mielcarek M *et al.* Epidemiology of leptospira transmitted by  
291 rodents in southeast Asia. *PLoS Negl Trop Dis* 2014;**8**:e2902.
- 292 Costa F, Hagan JE, Calcagno J *et al.* Global Morbidity and Mortality of Leptospirosis: A  
293 Systematic Review. *PLoS Negl Trop Dis* 2015a;**9**:e0003898.
- 294 Costa F, Wunder EA Jr, De Oliveira D *et al.* Patterns in *Leptospira* Shedding in Norway Rats  
295 (*Rattus norvegicus*) from Brazilian Slum Communities at High Risk of Disease  
296 Transmission. *PLoS Negl Trop Dis* 2015b;**9**:e0003819.
- 297 Cox TE, Smythe LD, Leung LK-P. Flying Foxes as Carriers of Pathogenic *Leptospira*  
298 Species. *J Wildl Dis* 2005;**41**:753–7.
- 299 Cumberland P, Everard CO, Wheeler JG *et al.* Persistence of anti-leptospiral IgM, IgG and  
300 agglutinating antibodies in patients presenting with acute febrile illness in Barbados  
301 1979-1989. *Eur J Epidemiol* 2001;**17**:601–8.
- 302 Desvars A, Naze F, Benneveau A *et al.* Endemicity of leptospirosis in domestic and wild  
303 animal species from Reunion Island (Indian Ocean). *Epidemiol Infect* 2013;**141**:1154–65.
- 304 Desvars A, Naze F, Vourc’h G *et al.* Similarities in *Leptospira* Serogroup and Species

- 305 Distribution in Animals and Humans in the Indian Ocean Island of Mayotte. *Am J Trop*  
306 *Med Hyg* 2012;**87**:134–40.
- 307 Dietrich M, Gomard Y, Lagadec E *et al.* Biogeography of *Leptospira* in wild animal  
308 communities inhabiting the insular ecosystem of the western Indian Ocean islands and  
309 neighboring Africa. *Emerg Microbes Infect* 2018;**7**:57.
- 310 Dietrich M, Wilkinson DA, Benlali A *et al.* *Leptospira* and Paramyxovirus infection  
311 dynamics in a bat maternity enlightens pathogen maintenance in wildlife. *Environ*  
312 *Microbiol* 2015, DOI: 10.1111/1462-2920.12766.
- 313 Dietrich M, Wilkinson DA, Soarimalala V *et al.* Diversification of an emerging pathogen in a  
314 biodiversity hotspot: *Leptospira* in endemic small mammals of Madagascar. *Mol Ecol*  
315 2014;**23**:2783–96.
- 316 Ellis WA, O'Brien JJ, Cassells J. Role of cattle in the maintenance of *Leptospira interrogans*  
317 serotype hardjo infection in Northern Ireland. *Vet Rec* 1981;**108**:555–7.
- 318 Gomard Y, Dietrich M, Wieseke N *et al.* Malagasy bats shelter a considerable genetic  
319 diversity of pathogenic *Leptospira* suggesting notable host-specificity patterns. *FEMS*  
320 *Microbiol Ecol* 2016, DOI: 10.1093/femsec/fiw037.
- 321 Gomes-Solecki M, Santecchia I, Werts C. Animal Models of Leptospirosis: Of Mice and  
322 Hamsters. *Front Immunol* 2017;**8**, DOI: 10.3389/fimmu.2017.00058.
- 323 Guernier V, Lagadec E, Cordonin C *et al.* Human Leptospirosis on Reunion Island, Indian  
324 Ocean: Are Rodents the (Only) Ones to Blame? *PLOS Negl Trop Dis* 2016;**10**:e0004733.
- 325 Guglielmini J, Bourhy P, Schiettekatte O *et al.* Genus-wide *Leptospira* core genome  
326 multilocus sequence typing for strain taxonomy and global surveillance. *PLoS Negl Trop*  
327 *Dis* 2019;**13**:e0007374.
- 328 Hamond C, Martins G, Loureiro AP *et al.* Urinary PCR as an increasingly useful tool for an  
329 accurate diagnosis of leptospirosis in livestock. *Vet Res Commun* 2014;**38**:81–5.
- 330 Ko AI, Goarant C, Picardeau M. *Leptospira*: the dawn of the molecular genetics era for an  
331 emerging zoonotic pathogen. *Nat Rev Microbiol* 2009;**7**:736–47.
- 332 Lagadec E, Gomard Y, Minter GL *et al.* Identification of *Tenrec ecaudatus*, a Wild Mammal  
333 Introduced to Mayotte Island, as a Reservoir of the Newly Identified Human Pathogenic  
334 *Leptospira mayottensis*. *PLOS Negl Trop Dis* 2016;**10**:e0004933.
- 335 Levett PN. Leptospirosis. *Clin Microbiol Rev* 2001;**14**:296–326.
- 336 Libonati H, Pinto PS, Lilenbaum W. Seronegativity of bovines face to their own recovered  
337 leptospiral isolates. *Microb Pathog* 2017;**108**:101–3.
- 338 Lloyd-Smith JO, Greig DJ, Hietala S *et al.* Cyclical changes in seroprevalence of leptospirosis  
339 in California sea lions: endemic and epidemic disease in one host species? *BMC Infect*  
340 *Dis* 2007;**7**:125.
- 341 Lupidi R, Cinco M, Balanzin D *et al.* Serological follow-up of patients involved in a localized  
342 outbreak of leptospirosis. *J Clin Microbiol* 1991;**29**:805–9.
- 343 Martin L, Pettit A. Sero-diagnostic de la spirochaetose icterohaemorrhagique. *Bull Mém*  
344 *Société Médicale Hôp Paris* 1918.
- 345 Matsui M, Roche L, Soupé-Gilbert M-E *et al.* Experimental Hamster Infection with a Strain  
346 of *Leptospira borgpetersenii* Ballum Isolated from a Reservoir Mouse in New Caledonia.  
347 *Am J Trop Med Hyg* 2015:14–0462.

- 348 Miraglia F, Moreno AM, Gomes CR *et al.* Isolation and characterization of *Leptospira*  
349 interrogans from pigs slaughtered in São Paulo State, Brazil. *Braz J Microbiol Publ Braz*  
350 *Soc Microbiol* 2008, DOI: 10.1590/S1517-838220080003000017.
- 351 Musso D, La Scola B. Laboratory diagnosis of leptospirosis: A challenge. *J Microbiol*  
352 *Immunol Infect* 2013;**46**:245–52.
- 353 Pagès F, Larrieu S, Simoes J *et al.* Investigation of a leptospirosis outbreak in triathlon  
354 participants, Réunion Island, 2013. *Epidemiol Infect* 2015:1–9.
- 355 Picardeau M. Diagnosis and epidemiology of leptospirosis. *Médecine Mal Infect* 2013;**43**:1–9.
- 356 Ratet G, Veyrier FJ, Fanton d'Andon M *et al.* Live Imaging of Bioluminescent *Leptospira*  
357 interrogans in Mice Reveals Renal Colonization as a Stealth Escape from the Blood  
358 Defenses and Antibiotics. *PLoS Negl Trop Dis* 2014;**8**, DOI:  
359 10.1371/journal.pntd.0003359.
- 360 Ristow P, Bourhy P, Kerneis S *et al.* Biofilm formation by saprophytic and pathogenic  
361 leptospires. *Microbiol Read Engl* 2008;**154**:1309–17.
- 362 Roberts MW, Smythe L, Dohnt M *et al.* Serologic-based investigation of leptospirosis in a  
363 population of free-ranging eastern grey kangaroos (*Macropus giganteus*) indicating the  
364 presence of *Leptospira weilii* serovar Topaz. *J Wildl Dis* 2010;**46**:564–9.
- 365 Rodrigues TCS, Santos ALQ, Lima AMC *et al.* Anti-*Leptospira* spp. antibodies in *Crotalus*  
366 durissus collilineatus kept in captivity and its zoonotic relevance. *Acta Trop*  
367 2016;**158**:39–42.
- 368 Saito M, Villanueva SYAM, Kawamura Y *et al.* *Leptospira idonii* sp. nov., isolated from  
369 environmental water. *Int J Syst Evol Microbiol* 2013;**63**:2457–62.
- 370 Sant'anna R, Vieira AS, Grapiglia J *et al.* High number of asymptomatic dogs as leptospiral  
371 carriers in an endemic area indicates a serious public health concern. *Epidemiol Infect*  
372 2017:1–3.
- 373 Sigaud M, Caceres S, Picard M *et al.* Tailless tenrec (*Tenrec ecaudatus*) □: natural  
374 maintenance host of leptospires? *Bull Société Pathol Exot* **102**:19–20.
- 375 Smythe LD, Chappel RJ. Leptospirosis – importance of a One Health approach. *Microbiol*  
376 *Aust* 2012;**33**:154–6.
- 377 Vincent AT, Schietekatte O, Goarant C *et al.* Revisiting the taxonomy and evolution of  
378 pathogenicity of the genus *Leptospira* through the prism of genomics. *PLoS Negl Trop*  
379 *Dis* 2019;**13**:e0007270.
- 380 Vinetz JM, Wilcox BA, Aguirre A *et al.* Beyond Disciplinary Boundaries: Leptospirosis as a  
381 Model of Incorporating Transdisciplinary Approaches to Understand Infectious Disease  
382 Emergence. *EcoHealth* 2005;**2**:291–306.
- 383 Wunder EA, Figueira CP, Santos GR *et al.* Real-Time PCR Reveals Rapid Dissemination of  
384 *Leptospira* interrogans after Intraperitoneal and Conjunctival Inoculation of Hamsters.  
385 *Infect Immun* 2016;**84**:2105–15.
- 386
- 387

**Table 1.** Animal species used in the present study and the associated publications for *Leptospira* investigations.

| <b>Animal species</b>           | <b>Islands</b> | <b>Serological data</b>             | <b>Molecular data</b>                                              |
|---------------------------------|----------------|-------------------------------------|--------------------------------------------------------------------|
| <i>Mormopterus acetabulosus</i> | Mauritius      | Present study                       | Dietrich <i>et al.</i> (2018)                                      |
| <i>Tenrec ecaudatus</i>         | Mayotte        | NA                                  | Lagadec <i>et al.</i> (2016)                                       |
|                                 | La Réunion     | Desvars <i>et al.</i> (2013a)       | Desvars <i>et al.</i> (2013a); Guernier <i>et al.</i> (2016)       |
| <i>Rattus rattus</i>            | Mayotte        | Desvars <i>et al.</i> (2012)        | Desvars <i>et al.</i> (2012)                                       |
|                                 | La Réunion     | Desvars <i>et al.</i> (2012, 2013a) | Desvars <i>et al.</i> (2012, 2013a); Guernier <i>et al.</i> (2016) |

NA: not available.

**Table 2.** Comparison of serological and molecular *Leptospira* data obtained from the investigated animal species.

| Animal species                  | Islands   | Serological data (MAT) |                                                                                                                                                                                           | Molecular data (RT PCR)          |                                                                                                                             |
|---------------------------------|-----------|------------------------|-------------------------------------------------------------------------------------------------------------------------------------------------------------------------------------------|----------------------------------|-----------------------------------------------------------------------------------------------------------------------------|
|                                 |           | Positive animals (%)   | Detected serogroups (titer)                                                                                                                                                               | Positive animals (%)             | <i>Leptospira</i> spp.                                                                                                      |
| <i>Mormopterus acetabulosus</i> | Mauritius | 20.0% (6/30)           | Panama (1:100 – 400) (n=5)<br>Pyrogenes (1:200) (n=1)                                                                                                                                     | 73.3% (22/30)                    | <i>Lb</i> (n=8)                                                                                                             |
|                                 | Mayotte   | NA                     | NA                                                                                                                                                                                        | 27.0% (10/37)                    | <i>Lm</i> (n=8)                                                                                                             |
| <i>Tenrec ecaudatus</i>         | Reunion   | 13.2% (5/38)           | Icterohaemorrhagiae (1:200 – 800) (n=3)<br>Canicola (1:100) (n=1)<br>Bataviae (1:100) (n=1)                                                                                               | 0.0% (0/35)<br>0.0% (0/35)       | -<br>-                                                                                                                      |
|                                 | Mayotte   | 11.2% (14/125)         | Mini (1:100 – 400) (n=7)<br>Pyrogenes (1:200) (n=1)<br>Grippotyphosa (1:100 – 1,600) (n=3)<br>Co-agglutinations (n=3)                                                                     | 29.8% (42/121)<br>15.9% (46/289) | <i>Lb</i> (n=9), <i>Li</i> (n=7), <i>Lk</i> (n=2),<br><i>Lm</i> (n=2)<br><i>Lb</i> (n=13), <i>Li</i> (n=3), <i>Lk</i> (n=5) |
| <i>Rattus rattus</i>            | Reunion   | 78.8% (52/66)          | Icterohaemorrhagiae (1:100 – 3,200) (n=22)<br>Canicola (1:100 – 400) (n=7)<br>Sejroe (1:100 – 1:200) (n=2)<br>Mini (1:100) (n=1)<br>Cynopteri (1:3,200) (n=1)<br>Co-agglutinations (n=19) | 65.8% (50/76)<br>38.5% (214/562) | NA<br><i>Li</i> (n=201)                                                                                                     |

*Lb*: *L. borgpetersenii*, *Li*: *L. interrogans*, *Lk*: *L. kirschneri*, *Lm*: *L. mayottensis*.

MAT: Microscopic Agglutination Test, RT PCR: Real-Time Polymerase Chain Reaction.

NA: not available

**Table S1.** Details of *Leptospira* strains used for the Microscopic Agglutination Test on *Mormopterus acetabulosus*.

| <b>Species</b>           | <b>Serogroup</b>    | <b>Serovar</b>      | <b>Strain</b>   |
|--------------------------|---------------------|---------------------|-----------------|
| <i>L. biflexa</i>        | Semarang            | Patoc               | Patoc I (Paris) |
| <i>L. borgpetersenii</i> | Ballum              | Castellonis         | Castellon 3     |
|                          | Sejroe              | Hardjobovis         | Sponselee       |
|                          | Sejroe              | Sejroe              | M 84            |
| <i>L. interrogans</i>    | Tarassovi           | Tarassovi           | Perepelicin     |
|                          | Australis           | Australis           | Ballico         |
|                          | Autumnalis          | Autumnalis          | Akiyami A       |
|                          | Bataviae            | Bataviae            | Van Tienen      |
|                          | Canicola            | Canicola            | Hond Utrecht IV |
|                          | Hebdomadis          | Hebdomadis          | Hebdomadis      |
|                          | Icterohaemorrhagiae | Copenhageni         | Wijiberg        |
|                          | Icterohaemorrhagiae | Icterohaemorrhagiae | -               |
|                          | Pomona              | Pomona              | -               |
|                          | Pyrogenes           | Pyrogenes           | Salinem         |
| <i>L. kirschneri</i>     | Cynopteri           | Cynopteri           | 3522C           |
|                          | Grippotyphosa       | Grippotyphosa       | Moskva V        |
|                          | Mini                | undertermined       | 200803703       |
| <i>L. noguchii</i>       | Panama              | Panama              | CZ 214K         |

**Table S2.** Details of bat samples, *Mormopterus acetabulosus* from Mauritius, used in the present study. The table includes the (a) Microscopic Agglutination Test (MAT) results and *Leptospira* molecular data obtained from the present study and the work of Dietrich et al. (2018) respectively. *RT-PCR*: Real-Time Polymerase Chain Reaction, *CT*: Cycle Threshold, *FMNH*: specimen deposited in the Field Museum of Natural History

| Specimen ID No. | ID extraction | Sex | Age | Date (day/month/year) | Site                          | Serology results |                                         | Molecular results |    |                                  |
|-----------------|---------------|-----|-----|-----------------------|-------------------------------|------------------|-----------------------------------------|-------------------|----|----------------------------------|
|                 |               |     |     |                       |                               | MAT              | <i>Leptospira</i> serogroup (MAT titer) | RT - PCR          | CT | <i>Leptospira</i> species        |
| FMNH 213456     | 152           | F   | A   | 14/12/10              | Palma Cave (Palma)            | (-)              | -                                       | (+)               |    | <i>L. borgpetersenii</i> related |
| FMNH 213457     | 153           | F   | A   | 14/12/10              | Palma Cave (Palma)            | (-)              | -                                       | (-)               | -  |                                  |
| FMNH 213458     | 154           | F   | A   | 14/12/10              | Palma Cave (Palma)            | (-)              | -                                       | (+)               |    |                                  |
| FMNH 213459     | 155           | M   | A   | 14/12/10              | Palma Cave (Palma)            | (-)              | -                                       | (-)               | -  |                                  |
| FMNH 213461     | 157           | M   | A   | 14/12/10              | Palma Cave (Palma)            | (-)              | -                                       | (-)               | -  |                                  |
| FMNH 213463     | 159           | M   | A   | 14/12/10              | Palma Cave (Palma)            | (-)              | -                                       | (+)               |    |                                  |
| FMNH 213465     | 161           | M   | A   | 14/12/10              | Palma Cave (Palma)            | (-)              | -                                       | (+)               |    | <i>L. borgpetersenii</i> related |
| FMNH 213466     | 162           | M   | A   | 14/12/10              | Palma Cave (Palma)            | (+)              | Pyrogenes (1:200)                       | (+)               |    | <i>L. borgpetersenii</i> related |
| FMNH 213467     | 163           | F   | A   | 14/12/10              | Palma Cave (Palma)            | (-)              | -                                       | (+)               |    |                                  |
| FMNH 213470     | 166           | M   | A   | 14/12/10              | Palma Cave (Palma)            | (-)              | -                                       | (+)               |    |                                  |
| FMNH 213471     | 167           | M   | A   | 14/12/10              | Palma Cave (Palma)            | (-)              | -                                       | (+)               |    |                                  |
| FMNH 213472     | 168           | F   | A   | 15/12/10              | Twilight Cave (Roches Noires) | (-)              | -                                       | (-)               | -  |                                  |
| FMNH 213475     | 171           | F   | A   | 15/12/10              | Twilight Cave (Roches Noires) | (-)              | -                                       | (-)               | -  |                                  |
| FMNH 213477     | 173           | M   | A   | 15/12/10              | Twilight Cave (Roches Noires) | (-)              | -                                       | (-)               | -  |                                  |

|                |     |   |   |          |                                    |     |                |     |                                        |
|----------------|-----|---|---|----------|------------------------------------|-----|----------------|-----|----------------------------------------|
| FMNH<br>213474 | 170 | F | A | 15/12/10 | Twilight Cave (Roches Noires)      | (-) | -              | (+) |                                        |
| FMNH<br>213479 | 175 | F | A | 15/12/10 | Twilight Cave (Roches Noires)      | (-) | -              | (+) |                                        |
| FMNH<br>213481 | 176 | F | A | 15/12/10 | Twilight Cave (Roches Noires)      | (-) | -              | (+) |                                        |
| FMNH<br>213483 | 179 | M | A | 15/12/10 | Twilight Cave (Roches Noires)      | (-) | -              | (-) | -                                      |
| FMNH<br>213485 | 181 | F | A | 15/12/10 | Caverne Trois Bras (Moulin à Vent) | (+) | Panama (1:100) | (+) | 42,00                                  |
| FMNH<br>213486 | 182 | F | A | 15/12/10 | Caverne Trois Bras (Moulin à Vent) | (-) | -              | (-) | -                                      |
| FMNH<br>213487 | 183 | F | A | 15/12/10 | Caverne Trois Bras (Moulin à Vent) | (-) | -              | (+) | 34,00 <i>L. borgpetersenii</i> related |
| FMNH<br>213489 | 185 | F | A | 15/12/10 | Caverne Trois Bras (Moulin à Vent) | (-) | -              | (+) | 37,00                                  |
| FMNH<br>213490 | 186 | F | A | 15/12/10 | Caverne Trois Bras (Moulin à Vent) | (-) | -              | (+) | 35,00                                  |
| FMNH<br>213491 | 187 | F | A | 15/12/10 | Caverne Trois Bras (Moulin à Vent) | (-) | -              | (+) | 38,00                                  |
| FMNH<br>213493 | 189 | F | A | 15/12/10 | Caverne Trois Bras (Moulin à Vent) | (+) | Panama (1:200) | (+) | 34,00                                  |
| FMNH<br>213494 | 190 | F | A | 15/12/10 | Caverne Trois Bras (Moulin à Vent) | (+) | Panama (1:400) | (+) | 35,00                                  |
| FMNH<br>213495 | 191 | F | A | 15/12/10 | Caverne Trois Bras (Moulin à Vent) | (-) | -              | (+) |                                        |
| FMNH<br>213503 | 199 | F | A | 16/12/10 | Camp Thorel Cave (Camp Thorel)     | (+) | Panama (1:400) | (+) | 40,00                                  |
| FMNH<br>213504 | 200 | M | A | 16/12/10 | Camp Thorel Cave (Camp Thorel)     | (-) | -              | (+) | 34,00                                  |
| FMNH<br>213508 | 204 | M | A | 16/12/10 | Camp Thorel Cave (Camp Thorel)     | (+) | Panama (1:400) | (+) | 37,00                                  |
